# Supplementary material for: Pre-Diagnostic Saliva Microbiota of School-Aged Children Who Developed Type 1 Diabetes or Inflammatory Bowel Diseases
Source: MDPI journal article supplement (doi:10.3390/ijms24098279), 2023-05-05
Supplement: s1 [file s1]

**Supplementary Figure S1.** Flow-chart showing available saliva samples in the Fin-HIT cohort, selection process, and categorization of saliva samples used in this study.

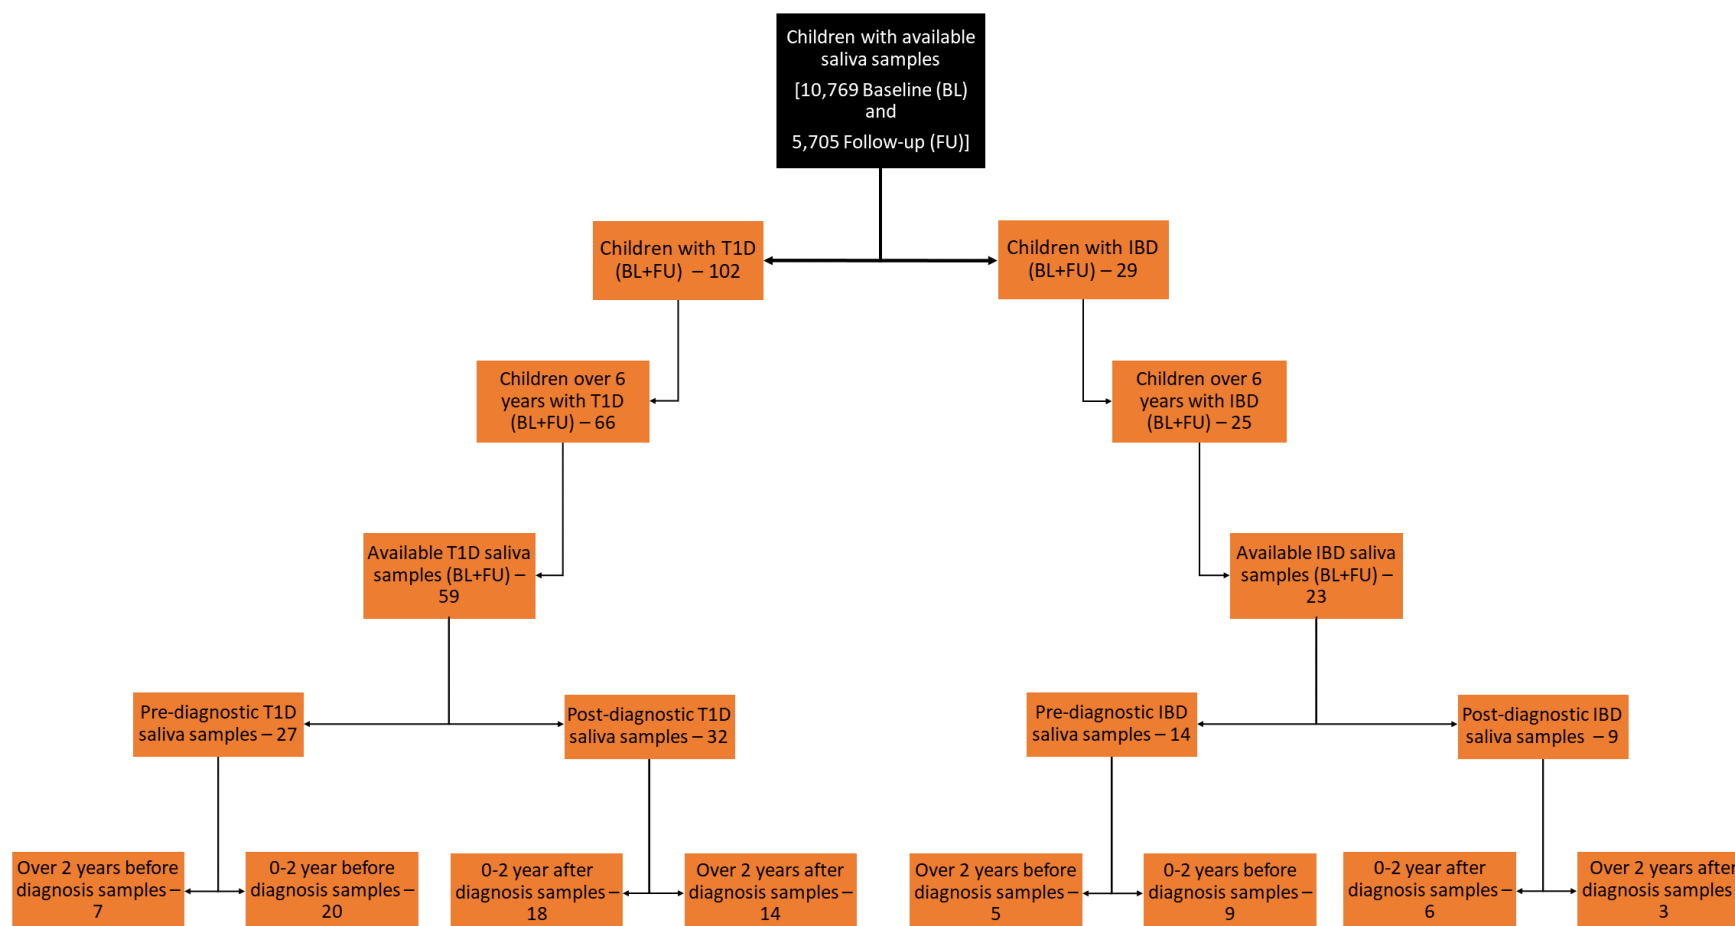

**Supplementary Figure S2.** PWY-5677 metabolic pathway fermenting succinate to butyrate, which was lower in the saliva of children who developed type 1 diabetes (T1D) within 0-2 years before diagnosis (n=20) than in all controls (n=81). Reprinted from MetaCyc (<https://metacyc.org/META/NEW-IMAGE?object=PWY-5677&redirect=T>).

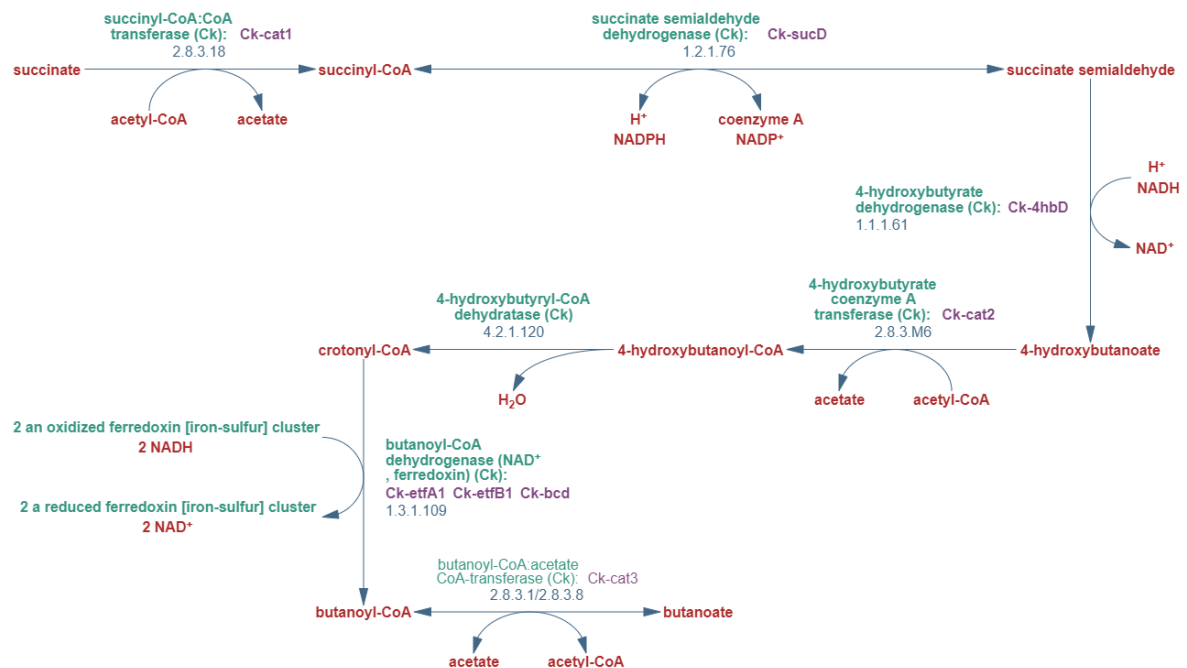

**Supplementary Figure S3.** Altered metabolic pathways (crude  $p$ -value  $\leq 0.05$ ) within 0-2 years before T1D diagnosis ( $n=20$ ) when compared with all controls ( $n=81$ ). PWY-5677 pathway marked in red was the only pathway significant after  $p$ -value correction.

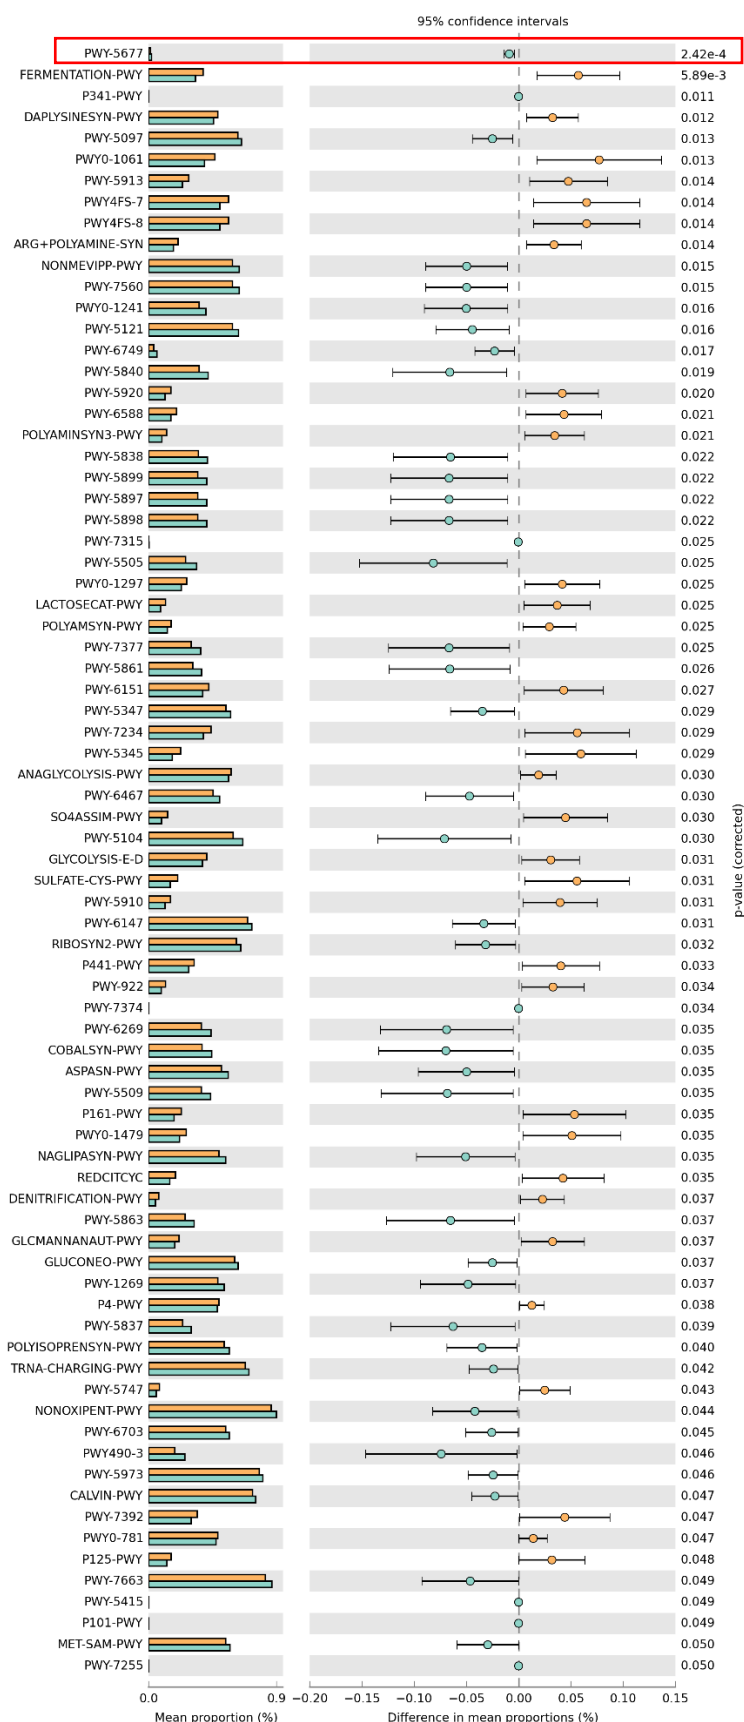

**Supplementary Figure S4.** Altered metabolic pathways (crude  $p$ -value  $\leq 0.05$ ) for A) all pre-diagnostic IBD samples (n=14; in red) when compared with all controls (n=81; in grey). B) all pre-diagnostic T1D samples (n=27; in green) when compared with all controls (n=81; in grey). None of these pathways remained significant after  $p$ -value correction.

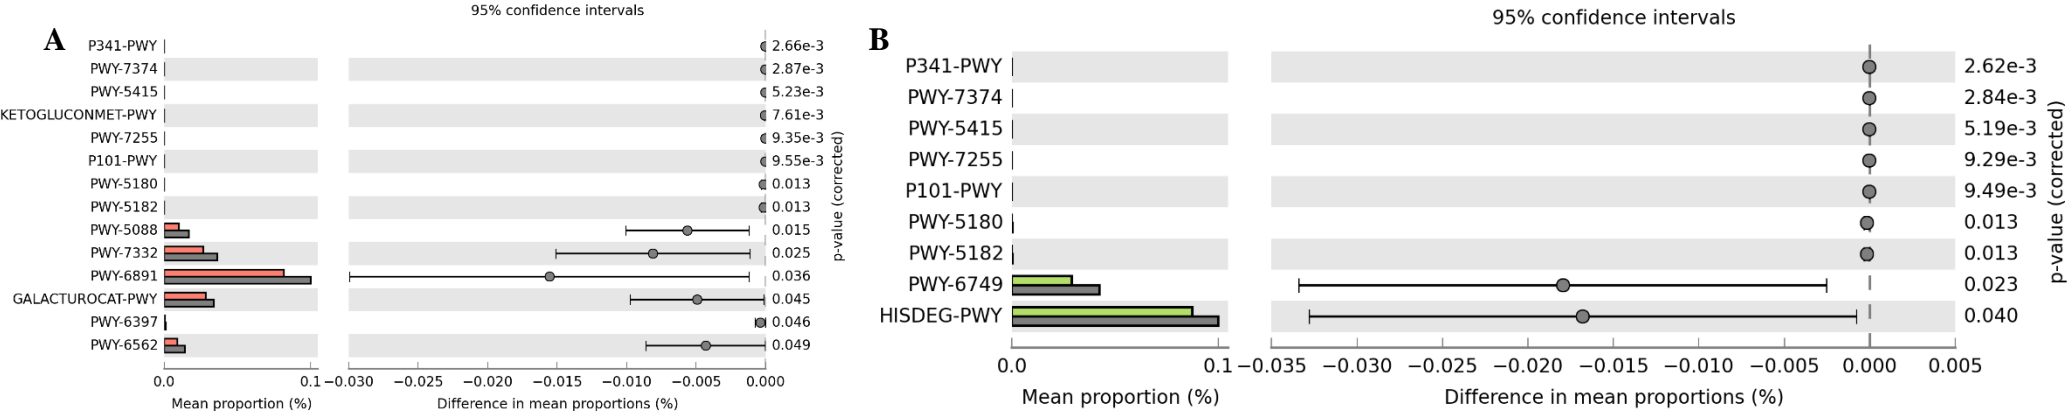

**Supplementary Table S1.** Comparison of beta-diversity using Permutational Multivariate Analysis of Variance (PERMANOVA) between 1) All pre-T1D and post-T1D samples; 2) All pre-IBD and post-IBD samples; and (3) pre- and post-diagnostic samples from the same individuals with either T1D or IBD (i.e. related samples).

|   | Comparison of Beta-diversity<br>between Saliva Samples                        | Sums Of<br>Squares | F statistics | R <sup>2</sup> | p-value | p-value<br>(corrected) |
|---|-------------------------------------------------------------------------------|--------------------|--------------|----------------|---------|------------------------|
| 1 | Pre-T1D vs. Post-T1D                                                          | 0.017              | 0.21         | 0.0035         | 0.96    | 0.96                   |
| 2 | Pre-IBD vs. Post-IBD                                                          | 0.103              | 1.30         | 0.0581         | 0.31    | 0.52                   |
| 3 | Pre- vs. Post-diagnostic<br>samples from the same<br>individuals with T1D/IBD | 0.032              | 0.33         | 0.02           | 0.87    | 0.87                   |
